# Supplementary material for: Communities of T4-like bacteriophages associated with bacteria in Lake Baikal: diversity and biogeography
Source: PeerJ journal article supplement (doi:10.7717/peerj.12748), 2022-01-12
Supplement: SupplementaryTable2.xlsx [file SupplementaryTable2.xlsx]

## Sheet: MK
query	taxid	accession	title	evalue	querycov	ident
Otu13	445686	YP_004324201	precursor of major head subunit [Synechococcus phage S-SSM7]	5.56386e-60	99.3	64.38
Otu45	929832	YP_007675133	hypothetical protein CPXG_00096 [Cyanophage P-RSM6]	7.57336e-59	99.29	68.97
Otu38	929832	YP_007675133	hypothetical protein CPXG_00096 [Cyanophage P-RSM6]	1.09352e-58	99.29	67.59
Otu44	1283076	YP_007517957	major capsid [Pelagibacter phage HTVC008M]	4.43813e-56	99.22	69.63
Otu9	445686	YP_004324201	precursor of major head subunit [Synechococcus phage S-SSM7]	2.31824e-55	99.26	60.62
Otu37	445686	YP_004324201	precursor of major head subunit [Synechococcus phage S-SSM7]	4.83374e-55	99.26	60.62
Otu8	1815521	YP_009325109	major capsid protein [Synechococcus phage S-WAM1]	8.77365e-55	99.26	64.83
Otu7	1283076	YP_007517957	major capsid [Pelagibacter phage HTVC008M]	1.76546e-54	99.25	66.19
Otu24	1647405	YP_009212304	precursor of major head subunit [Sinorhizobium phage phiN3]	2.72941e-54	99.33	62.34
Otu36	1283076	YP_007517957	major capsid [Pelagibacter phage HTVC008M]	8.10287e-54	99.26	64.75
Otu49	2023996	YP_009791290	major capsid protein [Synechococcus phage Bellamy]	7.52043e-53	99.33	63.58
Otu32	2023996	YP_009791290	major capsid protein [Synechococcus phage Bellamy]	1.7113e-52	99.35	60.98
Otu22	445686	YP_004324201	precursor of major head subunit [Synechococcus phage S-SSM7]	5.39614e-52	99.3	59.64
Otu48	445686	YP_004324201	precursor of major head subunit [Synechococcus phage S-SSM7]	1.28362e-51	99.3	59.01
Otu21	445686	YP_004324201	precursor of major head subunit [Synechococcus phage S-SSM7]	1.01607e-50	99.39	57.99
Otu39	2023996	YP_009791290	major capsid protein [Synechococcus phage Bellamy]	4.14286e-50	99.33	58.02
Otu1	1283076	YP_007517957	major capsid [Pelagibacter phage HTVC008M]	4.14517e-50	99.25	61.43
Otu31	1962671	YP_009599751	precursor of major head subunit [Serratia phage BF]	7.35685e-50	99.18	65.85
Otu18	2024264	YP_009611880	major capsid protein [Agrobacterium phage Atu_ph07]	9.11342e-50	99.19	63.71
Otu15	1357714	YP_009098938	major capsid protein [Caulobacter phage Cr30]	1.17325e-49	99.37	58.86
Otu2	268746	YP_214367	precursor of major head subunit [Prochlorococcus phage P-SSM2]	1.84669e-49	99.28	56.44
Otu27	562	WP_137592572	hypothetical protein [Escherichia coli]	2.44008e-49	99.18	63.2
Otu33	929832	YP_007675133	hypothetical protein CPXG_00096 [Cyanophage P-RSM6]	4.37009e-49	99.28	61.49
Otu4	1283076	YP_007517957	major capsid [Pelagibacter phage HTVC008M]	6.01798e-49	99.22	64.44
Otu42	1283076	YP_007517957	major capsid [Pelagibacter phage HTVC008M]	6.14761e-49	99.22	63.64
Otu20	1283076	YP_007517957	major capsid [Pelagibacter phage HTVC008M]	6.84135e-49	99.25	60.71
Otu30	1815521	YP_009325109	major capsid protein [Synechococcus phage S-WAM1]	1.05203e-48	99.32	59.33
Otu12	1647405	YP_009212304	precursor of major head subunit [Sinorhizobium phage phiN3]	1.87379e-48	99.25	61.38
Otu43	754042	YP_007674500	major capsid protein [Synechococcus phage S-SKS1]	9.4348e-48	99.33	59.12
Otu23	444860	YP_004322275	precursor of major head subunit [Synechococcus phage S-SM2]	1.71743e-47	99.33	58.75
Otu25	2023996	YP_009791290	major capsid protein [Synechococcus phage Bellamy]	8.20688e-47	99.33	58.39
Otu3	1283076	YP_007517957	major capsid [Pelagibacter phage HTVC008M]	1.07989e-46	99.26	60.71
Otu41	1815521	YP_009325109	major capsid protein [Synechococcus phage S-WAM1]	5.65962e-46	99.38	55.62
Otu5	555387	YP_003097339	major capsid protein [Synechococcus phage S-RSM4]	4.76625e-45	99.36	57.23
Otu46	445683	YP_004322790	precursor of major head subunit [Synechococcus phage S-ShM2]	2.19228e-44	99.37	55.42
Otu50	2010329	YP_009609699	major capsid protein [Acidovorax phage ACP17]	3.1846e-44	99.21	56.94
Otu10	562	WP_137592572	hypothetical protein [Escherichia coli]	8.15401e-44	99.24	56.72
Otu17	1493511	YP_009134352	head vertex precursor [Synechococcus phage ACG-2014f]	3.47568e-43	99.37	52.91
Otu6	1283076	YP_007517957	major capsid [Pelagibacter phage HTVC008M]	1.84423e-42	99.27	57.66
Otu34	536444	YP_007877734	major head protein [Cyanophage P-RSM1]	5.05531e-42	99.32	52.8
Otu35	754037	YP_007673099	major capsid protein [Synechococcus phage S-CAM1]	4.00688e-40	99.26	50.64
Otu40	1647405	YP_009212304	precursor of major head subunit [Sinorhizobium phage phiN3]	7.57285e-40	99.36	51.92
Otu29	2484640	YP_009816049	major capsid protein [Synechococcus phage S-P4]	2.95116e-39	99.39	48.5
Otu51	756278	YP_009783030	major capsid protein [Synechococcus phage S-RIM8]	7.1364e-39	99.38	49.7
Otu26	2023996	YP_009791290	major capsid protein [Synechococcus phage Bellamy]	1.46653e-38	99.4	48.54
Otu16	1493509	YP_009133444	head vertex precursor [Synechococcus phage ACG-2014d]	6.02539e-38	99.26	53.7
Otu11	869662	YP_007675586	major capsid protein [Synechococcus phage S-RIM2 R1_1999]	6.13965e-21	99.38	40.12
Otu14	1283076	YP_007517957	major capsid [Pelagibacter phage HTVC008M]	9.53001e-21	99.36	37.58
Otu19	1283076	YP_007517957	major capsid [Pelagibacter phage HTVC008M]	1.16363e-19	99.35	33.97
Otu47	687803	YP_009302210	major capsid protein [Cyanophage S-RIM50]	2.16733e-19	99.38	36.9
Otu28	1278479	YP_009301634	major capsid protein [Cyanophage S-RIM32]	9.19034e-17	99.35	34.12

## Sheet: MC
query	taxid	accession	title	evalue	querycov	ident
Otu10	445686	YP_004324201	precursor of major head subunit [Synechococcus phage S-SSM7]	5.56386e-60	99.3	64.38
Otu16	929832	YP_007675133	hypothetical protein CPXG_00096 [Cyanophage P-RSM6]	1.09352e-58	99.29	67.59
Otu14	445686	YP_004324201	precursor of major head subunit [Synechococcus phage S-SSM7]	2.31824e-55	99.26	60.62
Otu17	1815521	YP_009325109	major capsid protein [Synechococcus phage S-WAM1]	8.77365e-55	99.26	64.83
Otu18	445686	YP_004324201	precursor of major head subunit [Synechococcus phage S-SSM7]	5.39614e-52	99.3	59.64
Otu22	445686	YP_004324201	precursor of major head subunit [Synechococcus phage S-SSM7]	1.01607e-50	99.39	57.99
Otu3	1283076	YP_007517957	major capsid [Pelagibacter phage HTVC008M]	4.14517e-50	99.25	61.43
Otu19	1357714	YP_009098938	major capsid protein [Caulobacter phage Cr30]	1.17325e-49	99.37	58.86
Otu1	268746	YP_214367	precursor of major head subunit [Prochlorococcus phage P-SSM2]	1.84669e-49	99.28	56.44
Otu23	562	WP_137592572	hypothetical protein [Escherichia coli]	2.44008e-49	99.18	63.2
Otu8	929832	YP_007675133	hypothetical protein CPXG_00096 [Cyanophage P-RSM6]	4.37009e-49	99.28	61.49
Otu2	1283076	YP_007517957	major capsid [Pelagibacter phage HTVC008M]	6.01798e-49	99.22	64.44
Otu9	1283076	YP_007517957	major capsid [Pelagibacter phage HTVC008M]	6.84135e-49	99.25	60.71
Otu15	2023996	YP_009791290	major capsid protein [Synechococcus phage Bellamy]	8.20688e-47	99.33	58.39
Otu4	1283076	YP_007517957	major capsid [Pelagibacter phage HTVC008M]	1.07989e-46	99.26	60.71
Otu7	1283076	YP_007517957	major capsid [Pelagibacter phage HTVC008M]	1.16773e-46	99.25	61.15
Otu12	555387	YP_003097339	major capsid protein [Synechococcus phage S-RSM4]	4.76625e-45	99.36	57.23
Otu24	562	WP_137592572	hypothetical protein [Escherichia coli]	8.15401e-44	99.24	56.72
Otu6	1493511	YP_009134352	head vertex precursor [Synechococcus phage ACG-2014f]	3.47568e-43	99.37	52.91
Otu5	1283076	YP_007517957	major capsid [Pelagibacter phage HTVC008M]	1.84423e-42	99.27	57.66
Otu11	754037	YP_007673099	major capsid protein [Synechococcus phage S-CAM1]	4.00688e-40	99.26	50.64
Otu13	1815521	YP_009325109	major capsid protein [Synechococcus phage S-WAM1]	6.37036e-40	99.36	52.53
Otu21	869662	YP_007675586	major capsid protein [Synechococcus phage S-RIM2 R1_1999]	6.13965e-21	99.38	40.12
Otu20	1283076	YP_007517957	major capsid [Pelagibacter phage HTVC008M]	1.16363e-19	99.35	33.97

## Sheet: Turk
query	taxid	accession	title	evalue	querycov	ident
Otu6	444860	YP_004322275	precursor of major head subunit [Synechococcus phage S-SM2]	1.67183e-73	99.39	71.95
Otu27	1815521	YP_009325109	major capsid protein [Synechococcus phage S-WAM1]	2.25212e-66	99.38	67.08
Otu22	929832	YP_007675133	hypothetical protein CPXG_00096 [Cyanophage P-RSM6]	1.36971e-59	99.29	68.97
Otu20	1283076	YP_007517957	major capsid [Pelagibacter phage HTVC008M]	1.18761e-57	99.24	70.07
Otu1	445686	YP_004324201	precursor of major head subunit [Synechococcus phage S-SSM7]	2.31824e-55	99.26	60.62
Otu9	445686	YP_004324201	precursor of major head subunit [Synechococcus phage S-SSM7]	4.83374e-55	99.26	60.62
Otu3	1283076	YP_007517957	major capsid [Pelagibacter phage HTVC008M]	5.55361e-55	99.25	66.91
Otu4	1815521	YP_009325109	major capsid protein [Synechococcus phage S-WAM1]	8.77365e-55	99.26	64.83
Otu13	1283076	YP_007517957	major capsid [Pelagibacter phage HTVC008M]	2.13189e-54	99.24	68.61
Otu24	1647405	YP_009212304	precursor of major head subunit [Sinorhizobium phage phiN3]	2.72941e-54	99.33	62.34
Otu15	445686	YP_004324201	precursor of major head subunit [Synechococcus phage S-SSM7]	1.85884e-53	99.26	58.75
Otu17	1962671	YP_009599751	precursor of major head subunit [Serratia phage BF]	4.30405e-52	99.17	65.85
Otu16	445686	YP_004324201	precursor of major head subunit [Synechococcus phage S-SSM7]	3.597e-50	99.38	56.97
Otu12	445686	YP_004324201	precursor of major head subunit [Synechococcus phage S-SSM7]	5.35281e-50	99.39	57.32
Otu19	1357714	YP_009098938	major capsid protein [Caulobacter phage Cr30]	1.17325e-49	99.37	58.86
Otu14	754042	YP_007674500	major capsid protein [Synechococcus phage S-SKS1]	1.71067e-48	99.4	57.23
Otu26	1283076	YP_007517957	major capsid [Pelagibacter phage HTVC008M]	4.41025e-48	99.22	62.88
Otu18	1283076	YP_007517957	major capsid [Pelagibacter phage HTVC008M]	5.28522e-48	99.22	62.41
Otu2	1815521	YP_009325109	major capsid protein [Synechococcus phage S-WAM1]	5.65962e-46	99.38	55.62
Otu25	555387	YP_003097339	major capsid protein [Synechococcus phage S-RSM4]	4.76625e-45	99.36	57.23
Otu7	1493512	YP_009133670	head vertex precursor [Synechococcus phage ACG-2014g]	6.98679e-45	99.35	57.06
Otu23	562	WP_137592572	hypothetical protein [Escherichia coli]	8.15401e-44	99.24	56.72
Otu5	1493509	YP_009133444	head vertex precursor [Synechococcus phage ACG-2014d]	6.79801e-40	99.26	53.7
Otu11	756278	YP_009783030	major capsid protein [Synechococcus phage S-RIM8]	7.1364e-39	99.38	49.7
Otu21	1493509	YP_009133444	head vertex precursor [Synechococcus phage ACG-2014d]	2.84247e-38	99.28	52.76
Otu8	444878	YP_004323731	precursor of major head subunit [Prochlorococcus phage Syn33]	5.78067e-38	99.38	49.4
Otu30	1283076	YP_007517957	major capsid [Pelagibacter phage HTVC008M]	1.29591e-37	99.26	55.63
Otu10	536466	YP_007677276	major capsid [Synechococcus phage S-SSM4]	9.25881e-34	99.21	48.75
Otu29	445700	YP_004322545	precursor of major head subunit [Prochlorococcus phage P-HM1]	2.5769e-32	99.44	45.9
Otu28	1885242	YP_009831235	major capsid protein [Cronobacter phage vB_CsaM_leB]	1.71106e-19	99.39	34.15

## Sheet: Posol_S
query	taxid	accession	title	evalue	querycov	ident
Otu51	2023996	YP_009791290	major capsid protein [Synechococcus phage Bellamy]	1.93211e-75	99.39	72.56
Otu45	444860	YP_004322275	precursor of major head subunit [Synechococcus phage S-SM2]	1.67183e-73	99.39	71.95
Otu1	754042	YP_007674500	major capsid protein [Synechococcus phage S-SKS1]	7.78389e-66	99.38	67.07
Otu47	1493511	YP_009134352	head vertex precursor [Synechococcus phage ACG-2014f]	1.01545e-62	99.34	65.45
Otu37	1815521	YP_009325109	major capsid protein [Synechococcus phage S-WAM1]	4.66638e-60	99.33	68.21
Otu27	929832	YP_007675133	hypothetical protein CPXG_00096 [Cyanophage P-RSM6]	7.56004e-58	99.32	65.99
Otu43	1815521	YP_009325109	major capsid protein [Synechococcus phage S-WAM1]	1.018e-56	99.33	65.1
Otu63	1815521	YP_009325109	major capsid protein [Synechococcus phage S-WAM1]	1.29987e-55	99.33	62.75
Otu71	1283076	YP_007517957	major capsid [Pelagibacter phage HTVC008M]	1.44931e-55	99.24	69.34
Otu9	445686	YP_004324201	precursor of major head subunit [Synechococcus phage S-SSM7]	2.31824e-55	99.26	60.62
Otu11	268746	YP_214367	precursor of major head subunit [Prochlorococcus phage P-SSM2]	3.20269e-55	99.35	60.74
Otu55	1283076	YP_007517957	major capsid [Pelagibacter phage HTVC008M]	5.55361e-55	99.25	66.91
Otu32	2023996	YP_009791290	major capsid protein [Synechococcus phage Bellamy]	6.48766e-55	99.37	62.58
Otu22	1815521	YP_009325109	major capsid protein [Synechococcus phage S-WAM1]	8.77365e-55	99.26	64.83
Otu72	268746	YP_214367	precursor of major head subunit [Prochlorococcus phage P-SSM2]	1.04339e-54	99.35	61.35
Otu3	1815521	YP_009325109	major capsid protein [Synechococcus phage S-WAM1]	1.78945e-54	99.32	64.63
Otu50	1283076	YP_007517957	major capsid [Pelagibacter phage HTVC008M]	2.13189e-54	99.24	68.61
Otu18	1283076	YP_007517957	major capsid [Pelagibacter phage HTVC008M]	2.16866e-54	99.22	68.89
Otu67	2023996	YP_009791290	major capsid protein [Synechococcus phage Bellamy]	2.18687e-54	99.34	60.25
Otu46	268746	YP_214367	precursor of major head subunit [Prochlorococcus phage P-SSM2]	2.6929e-54	99.34	60.74
Otu31	1647405	YP_009212304	precursor of major head subunit [Sinorhizobium phage phiN3]	2.72941e-54	99.33	62.34
Otu28	268746	YP_214367	precursor of major head subunit [Prochlorococcus phage P-SSM2]	3.81874e-54	99.35	61.96
Otu73	268746	YP_214367	precursor of major head subunit [Prochlorococcus phage P-SSM2]	5.03459e-54	99.35	60.12
Otu10	268746	YP_214367	precursor of major head subunit [Prochlorococcus phage P-SSM2]	1.15076e-53	99.35	59.76
Otu16	268746	YP_214367	precursor of major head subunit [Prochlorococcus phage P-SSM2]	2.33169e-53	99.25	60.74
Otu74	2023996	YP_009791290	major capsid protein [Synechococcus phage Bellamy]	2.34124e-53	99.32	61.01
Otu41	268746	YP_214367	precursor of major head subunit [Prochlorococcus phage P-SSM2]	2.66401e-53	99.35	59.76
Otu17	2023996	YP_009791290	major capsid protein [Synechococcus phage Bellamy]	3.21706e-53	99.33	63.58
Otu34	2023996	YP_009791290	major capsid protein [Synechococcus phage Bellamy]	6.31351e-53	99.37	60.84
Otu30	562	WP_137592572	hypothetical protein [Escherichia coli]	7.40721e-53	99.17	67.48
Otu61	1283076	YP_007517957	major capsid [Pelagibacter phage HTVC008M]	7.68183e-53	99.24	66.42
Otu19	1883369	YP_009322548	major capsid protein [Synechococcus phage S-CAM9]	1.20553e-52	99.3	61.15
Otu68	2023996	YP_009791290	major capsid protein [Synechococcus phage Bellamy]	1.7113e-52	99.35	60.98
Otu66	1815521	YP_009325109	major capsid protein [Synechococcus phage S-WAM1]	5.02427e-52	99.32	57.82
Otu38	562	WP_137592572	hypothetical protein [Escherichia coli]	1.08256e-51	99.17	65.04
Otu40	754042	YP_007674500	major capsid protein [Synechococcus phage S-SKS1]	1.60652e-51	99.32	61.25
Otu23	2023996	YP_009791290	major capsid protein [Synechococcus phage Bellamy]	8.27297e-51	99.37	59.88
Otu26	2023996	YP_009791290	major capsid protein [Synechococcus phage Bellamy]	2.70218e-50	99.34	59.88
Otu7	2023996	YP_009791290	major capsid protein [Synechococcus phage Bellamy]	4.14286e-50	99.33	58.02
Otu69	1357714	YP_009098938	major capsid protein [Caulobacter phage Cr30]	1.17325e-49	99.37	58.86
Otu52	2024264	YP_009611880	major capsid protein [Agrobacterium phage Atu_ph07]	1.4737e-49	99.19	63.71
Otu53	268746	YP_214367	precursor of major head subunit [Prochlorococcus phage P-SSM2]	1.71996e-49	99.37	57.06
Otu60	268746	YP_214367	precursor of major head subunit [Prochlorococcus phage P-SSM2]	1.85214e-49	99.37	58.08
Otu54	2023996	YP_009791290	major capsid protein [Synechococcus phage Bellamy]	2.16151e-49	99.34	60.87
Otu59	1542477	YP_009213621	putative precursor of major head subunit [Prochlorococcus phage P-TIM68]	2.69716e-49	99.34	55.95
Otu64	1815521	YP_009325109	major capsid protein [Synechococcus phage S-WAM1]	2.79497e-49	99.37	60
Otu70	268746	YP_214367	precursor of major head subunit [Prochlorococcus phage P-SSM2]	2.99177e-49	99.34	57.06
Otu15	1283076	YP_007517957	major capsid [Pelagibacter phage HTVC008M]	6.14761e-49	99.22	63.64
Otu35	562	WP_137592572	hypothetical protein [Escherichia coli]	2.16595e-48	99.24	61.83
Otu65	1283076	YP_007517957	major capsid [Pelagibacter phage HTVC008M]	1.16607e-47	99.25	60.71
Otu58	562	WP_137592572	hypothetical protein [Escherichia coli]	1.37791e-47	99.15	61.79
Otu44	869662	YP_007675586	major capsid protein [Synechococcus phage S-RIM2 R1_1999]	3.87055e-47	99.37	59.64
Otu48	1283076	YP_007517957	major capsid [Pelagibacter phage HTVC008M]	4.81386e-47	99.26	60.71
Otu2	1647405	YP_009212304	precursor of major head subunit [Sinorhizobium phage phiN3]	9.25819e-47	99.22	61.38
Otu29	929832	YP_007675133	hypothetical protein CPXG_00096 [Cyanophage P-RSM6]	2.71077e-46	99.29	60.93
Otu39	1493509	YP_009133444	head vertex precursor [Synechococcus phage ACG-2014d]	3.08165e-46	99.36	55.49
Otu12	869662	YP_007675586	major capsid protein [Synechococcus phage S-RIM2 R1_1999]	3.50137e-46	99.38	58.43
Otu33	1815521	YP_009325109	major capsid protein [Synechococcus phage S-WAM1]	5.65962e-46	99.38	55.62
Otu5	1815521	YP_009325109	major capsid protein [Synechococcus phage S-WAM1]	5.73211e-46	99.26	59.18
Otu42	1493511	YP_009134352	head vertex precursor [Synechococcus phage ACG-2014f]	7.58417e-46	99.3	54.55
Otu49	562	WP_137592572	hypothetical protein [Escherichia coli]	1.30718e-45	99.24	59.85
Otu8	869662	YP_007675586	major capsid protein [Synechococcus phage S-RIM2 R1_1999]	1.43866e-45	99.38	57.83
Otu25	2023996	YP_009791290	major capsid protein [Synechococcus phage Bellamy]	1.44002e-45	99.38	55.49
Otu20	2023996	YP_009791290	major capsid protein [Synechococcus phage Bellamy]	7.94412e-44	99.37	55.83
Otu13	2023996	YP_009791290	major capsid protein [Synechococcus phage Bellamy]	1.05437e-43	99.37	55.83
Otu14	1357714	YP_009098938	major capsid protein [Caulobacter phage Cr30]	1.40482e-43	99.37	55.35
Otu21	2023996	YP_009791290	major capsid protein [Synechococcus phage Bellamy]	2.06218e-43	99.37	55.83
Otu56	1340812	YP_009007969	precursor of head vertex protein [Synechococcus phage S-MbCM100]	9.12156e-41	99.4	50
Otu24	754037	YP_007673099	major capsid protein [Synechococcus phage S-CAM1]	4.00688e-40	99.26	50.64
Otu6	1493509	YP_009133444	head vertex precursor [Synechococcus phage ACG-2014d]	1.94936e-39	99.28	53.37
Otu36	1647405	YP_009212304	precursor of major head subunit [Sinorhizobium phage phiN3]	9.57031e-39	99.27	53.69
Otu57	1493509	YP_009133444	head vertex precursor [Synechococcus phage ACG-2014d]	2.75943e-38	99.26	54.32
Otu75	268746	YP_214367	precursor of major head subunit [Prochlorococcus phage P-SSM2]	6.47525e-34	99.45	45.6
Otu4	1647405	YP_009212304	precursor of major head subunit [Sinorhizobium phage phiN3]	1.14269e-19	99.35	34.76

## Sheet: LT_05
query	taxid	accession	title	evalue	querycov	ident
Otu31	754037	YP_007673099	major capsid protein [Synechococcus phage S-CAM1]	5.84901e-78	99.35	77.92
Otu5	444860	YP_004322275	precursor of major head subunit [Synechococcus phage S-SM2]	1.67183e-73	99.39	71.95
Otu9	1815521	YP_009325109	major capsid protein [Synechococcus phage S-WAM1]	2.25212e-66	99.38	67.08
Otu26	445686	YP_004324201	precursor of major head subunit [Synechococcus phage S-SSM7]	4.31576e-59	99.3	65
Otu14	1283076	YP_007517957	major capsid [Pelagibacter phage HTVC008M]	1.18761e-57	99.24	70.07
Otu2	445686	YP_004324201	precursor of major head subunit [Synechococcus phage S-SSM7]	2.31824e-55	99.26	60.62
Otu20	445686	YP_004324201	precursor of major head subunit [Synechococcus phage S-SSM7]	4.83374e-55	99.26	60.62
Otu1	1283076	YP_007517957	major capsid [Pelagibacter phage HTVC008M]	5.55361e-55	99.25	66.91
Otu4	1815521	YP_009325109	major capsid protein [Synechococcus phage S-WAM1]	8.77365e-55	99.26	64.83
Otu11	1283076	YP_007517957	major capsid [Pelagibacter phage HTVC008M]	2.13189e-54	99.24	68.61
Otu7	1647405	YP_009212304	precursor of major head subunit [Sinorhizobium phage phiN3]	2.72941e-54	99.33	62.34
Otu35	1815521	YP_009325109	major capsid protein [Synechococcus phage S-WAM1]	4.2046e-53	99.32	60.78
Otu22	929832	YP_007675133	hypothetical protein CPXG_00096 [Cyanophage P-RSM6]	5.66543e-53	99.3	66.44
Otu12	2023996	YP_009791290	major capsid protein [Synechococcus phage Bellamy]	1.7113e-52	99.35	60.98
Otu21	1962671	YP_009599751	precursor of major head subunit [Serratia phage BF]	4.30405e-52	99.17	65.85
Otu34	2023996	YP_009791290	major capsid protein [Synechococcus phage Bellamy]	1.90664e-51	99.36	58.93
Otu25	268746	YP_214367	precursor of major head subunit [Prochlorococcus phage P-SSM2]	2.67691e-51	99.34	58.28
Otu18	1357714	YP_009098938	major capsid protein [Caulobacter phage Cr30]	4.18194e-51	99.32	61.49
Otu16	445686	YP_004324201	precursor of major head subunit [Synechococcus phage S-SSM7]	3.597e-50	99.38	56.97
Otu10	445686	YP_004324201	precursor of major head subunit [Synechococcus phage S-SSM7]	5.35281e-50	99.39	57.32
Otu6	1357714	YP_009098938	major capsid protein [Caulobacter phage Cr30]	1.17325e-49	99.37	58.86
Otu8	754042	YP_007674500	major capsid protein [Synechococcus phage S-SKS1]	1.71067e-48	99.4	57.23
Otu36	1283076	YP_007517957	major capsid [Pelagibacter phage HTVC008M]	4.41025e-48	99.22	62.88
Otu19	1283076	YP_007517957	major capsid [Pelagibacter phage HTVC008M]	8.44242e-48	99.22	62.41
Otu29	1647405	YP_009212304	precursor of major head subunit [Sinorhizobium phage phiN3]	9.25819e-47	99.22	61.38
Otu3	1815521	YP_009325109	major capsid protein [Synechococcus phage S-WAM1]	5.65962e-46	99.38	55.62
Otu24	1815521	YP_009325109	major capsid protein [Synechococcus phage S-WAM1]	4.64882e-45	99.32	57.24
Otu17	1493512	YP_009133670	head vertex precursor [Synechococcus phage ACG-2014g]	6.98679e-45	99.35	57.06
Otu28	445683	YP_004322790	precursor of major head subunit [Synechococcus phage S-ShM2]	2.19228e-44	99.37	55.42
Otu33	562	WP_137592572	hypothetical protein [Escherichia coli]	8.15401e-44	99.24	56.72
Otu15	756278	YP_009783030	major capsid protein [Synechococcus phage S-RIM8]	7.1364e-39	99.38	49.7
Otu32	1493509	YP_009133444	head vertex precursor [Synechococcus phage ACG-2014d]	2.41115e-38	99.29	51.88
Otu23	1340812	YP_009007969	precursor of head vertex protein [Synechococcus phage S-MbCM100]	3.28477e-38	99.37	49.07
Otu13	444878	YP_004323731	precursor of major head subunit [Prochlorococcus phage Syn33]	5.78067e-38	99.38	49.4
Otu30	1283076	YP_007517957	major capsid [Pelagibacter phage HTVC008M]	1.29591e-37	99.26	55.63
Otu27	445700	YP_004322545	precursor of major head subunit [Prochlorococcus phage P-HM1]	2.5769e-32	99.44	45.9

## Sheet: LT_1015
query	taxid	accession	title	evalue	querycov	ident
Otu29	754037	YP_007673099	major capsid protein [Synechococcus phage S-CAM1]	3.06051e-78	99.35	77.92
Otu5	444860	YP_004322275	precursor of major head subunit [Synechococcus phage S-SM2]	1.67183e-73	99.39	71.95
Otu11	1815521	YP_009325109	major capsid protein [Synechococcus phage S-WAM1]	2.25212e-66	99.38	67.08
Otu26	445686	YP_004324201	precursor of major head subunit [Synechococcus phage S-SSM7]	4.31576e-59	99.3	65
Otu16	1283076	YP_007517957	major capsid [Pelagibacter phage HTVC008M]	1.18761e-57	99.24	70.07
Otu2	445686	YP_004324201	precursor of major head subunit [Synechococcus phage S-SSM7]	2.31824e-55	99.26	60.62
Otu15	445686	YP_004324201	precursor of major head subunit [Synechococcus phage S-SSM7]	4.83374e-55	99.26	60.62
Otu1	1283076	YP_007517957	major capsid [Pelagibacter phage HTVC008M]	5.55361e-55	99.25	66.91
Otu4	1815521	YP_009325109	major capsid protein [Synechococcus phage S-WAM1]	8.77365e-55	99.26	64.83
Otu8	1283076	YP_007517957	major capsid [Pelagibacter phage HTVC008M]	2.13189e-54	99.24	68.61
Otu34	1815521	YP_009325109	major capsid protein [Synechococcus phage S-WAM1]	2.22316e-54	99.32	60.67
Otu13	1647405	YP_009212304	precursor of major head subunit [Sinorhizobium phage phiN3]	2.72941e-54	99.33	62.34
Otu19	445686	YP_004324201	precursor of major head subunit [Synechococcus phage S-SSM7]	1.85884e-53	99.26	58.75
Otu33	1815521	YP_009325109	major capsid protein [Synechococcus phage S-WAM1]	4.2046e-53	99.32	60.78
Otu27	1962671	YP_009599751	precursor of major head subunit [Serratia phage BF]	5.00296e-53	99.19	68
Otu25	929832	YP_007675133	hypothetical protein CPXG_00096 [Cyanophage P-RSM6]	5.66543e-53	99.3	66.44
Otu32	2023996	YP_009791290	major capsid protein [Synechococcus phage Bellamy]	1.7113e-52	99.35	60.98
Otu30	1962671	YP_009599751	precursor of major head subunit [Serratia phage BF]	4.30405e-52	99.17	65.85
Otu14	268746	YP_214367	precursor of major head subunit [Prochlorococcus phage P-SSM2]	2.67691e-51	99.34	58.28
Otu21	1357714	YP_009098938	major capsid protein [Caulobacter phage Cr30]	4.18194e-51	99.32	61.49
Otu12	445686	YP_004324201	precursor of major head subunit [Synechococcus phage S-SSM7]	3.597e-50	99.38	56.97
Otu10	445686	YP_004324201	precursor of major head subunit [Synechococcus phage S-SSM7]	5.35281e-50	99.39	57.32
Otu6	1357714	YP_009098938	major capsid protein [Caulobacter phage Cr30]	1.17325e-49	99.37	58.86
Otu7	754042	YP_007674500	major capsid protein [Synechococcus phage S-SKS1]	1.71067e-48	99.4	57.23
Otu28	1283076	YP_007517957	major capsid [Pelagibacter phage HTVC008M]	4.41025e-48	99.22	62.88
Otu24	1283076	YP_007517957	major capsid [Pelagibacter phage HTVC008M]	8.44242e-48	99.22	62.41
Otu31	1647405	YP_009212304	precursor of major head subunit [Sinorhizobium phage phiN3]	9.25819e-47	99.22	61.38
Otu3	1815521	YP_009325109	major capsid protein [Synechococcus phage S-WAM1]	5.65962e-46	99.38	55.62
Otu9	1493512	YP_009133670	head vertex precursor [Synechococcus phage ACG-2014g]	6.98679e-45	99.35	57.06
Otu22	445683	YP_004322790	precursor of major head subunit [Synechococcus phage S-ShM2]	2.19228e-44	99.37	55.42
Otu35	562	WP_137592572	hypothetical protein [Escherichia coli]	8.15401e-44	99.24	56.72
Otu20	756278	YP_009783030	major capsid protein [Synechococcus phage S-RIM8]	7.1364e-39	99.38	49.7
Otu17	1340812	YP_009007969	precursor of head vertex protein [Synechococcus phage S-MbCM100]	3.28477e-38	99.37	49.07
Otu18	444878	YP_004323731	precursor of major head subunit [Prochlorococcus phage Syn33]	5.78067e-38	99.38	49.4
Otu23	445700	YP_004322545	precursor of major head subunit [Prochlorococcus phage P-HM1]	2.5769e-32	99.44	45.9
