# Supplementary material for: Communities of T4-like bacteriophages associated with bacteria in Lake Baikal: diversity and biogeography
Source: PeerJ journal article supplement (doi:10.7717/peerj.12748), 2022-01-12
Supplement: SupplementaryTable_1.docx [file SupplementaryTable_1.docx]

| Sample | GC – content, % | Total raw reads | After trimming (reads) | Singletons / doubletons | After deleting  singletons / doubletons | Number of OTUs after removal of chimeras, singletons and doubletons, 97% identity |
| --- | --- | --- | --- | --- | --- | --- |
| MK | 47 | 41802 | 37745 | 13579/989 | 23177 | 51 |
| MС | 46 | 16462 | 15446 | 5777/443 | 9226 | 24 |
| Turk | 47 | 12454 | 11394 | 5062/333 | 5999 | 30 |
| Posol_S | 45 | 19940 | 18044 | 8146/470 | 9428 | 74 |
| LT_05 | 46 | 15368 | 13818 | 5090/370 | 8358 | 36 |
| LT_1015 | 47 | 13180 | 11902 | 4552/317 | 7033 | 35 |
